# Supplementary material for: Effect of computationally designed fragment-based analogs on the RBD–ACE2 complex of the SARS-CoV-2 P.1 variant
Source: Royal Society of Chemistry journal article supplement (doi:10.1039/d3me00193h), 2024-01-01
Supplement: d3me00193h1.pdf [file d3me00193h1.pdf]

**Supplementary information**

**Effect of Computationally Designed Fragment-based Analogs on the RBD-ACE2 Complex  
of SARS-CoV-2 P.1 Variant**

**Surabhi Lata and Mohd. Akif\***

Laboratory of Structural Biology, Department of Biochemistry, School of Life Sciences,  
University of Hyderabad, Hyderabad, India

**Keywords:** COVID-19, SARS-CoV-2, Spike protein, variant, ACE2 receptor, Molecular dynamic simulation, small molecule inhibitor, Fragment-based analog

**\*Correspondence:**

Mohd. Akif ([akif@uohyd.ac.in](mailto:akif@uohyd.ac.in))

## Supplementary Figure Legends

**Figure S1. Protein and compounds interaction.** Interactions are shown on a representative structure after 200 ns of MDS. **(A)** Compound 1 and residues from the complex. **(B)** Compound 2 and residues from the complex. Compounds are shown in orange color stick and interacting residues are in blue stick. Hydrogen bonds, hydrophobic interactions and halogen interactions are represented in blue, grey, and green lines, respectively. Interacting residues are labeled.

**Figure S2. Hydrogen bond plots during 200 ns MDS.** **(A)** Between RBD and ACE2 of the Apo and compound bond complexes **(B)** Between Compounds and ACE2 **(C)** Between Compounds and RBD. Plots of hydrogen bonds are shown as black, red and blue in Apo complex, Compounds 1 and 2 complexes, respectively.

**Figure S3. Radius of gyration plot during 200ns of MDS.** Radius of gyration plots are represented in black, red and blue for the Apo, compound 1-bound and compound 2-bound complexes, respectively.

Figure S1

A)

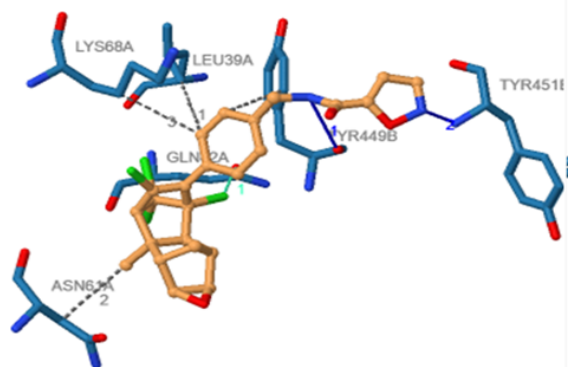

B)

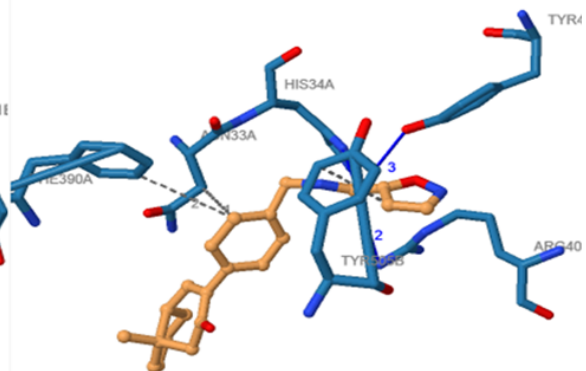

Figure S2

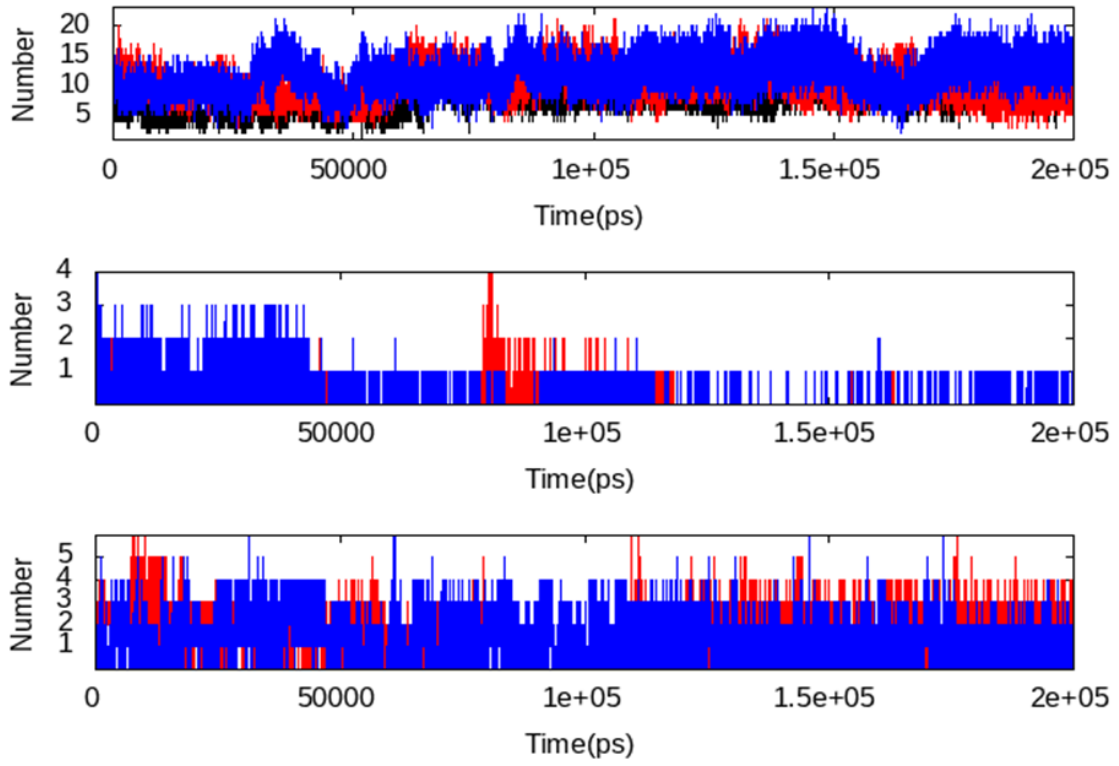

Figure S3

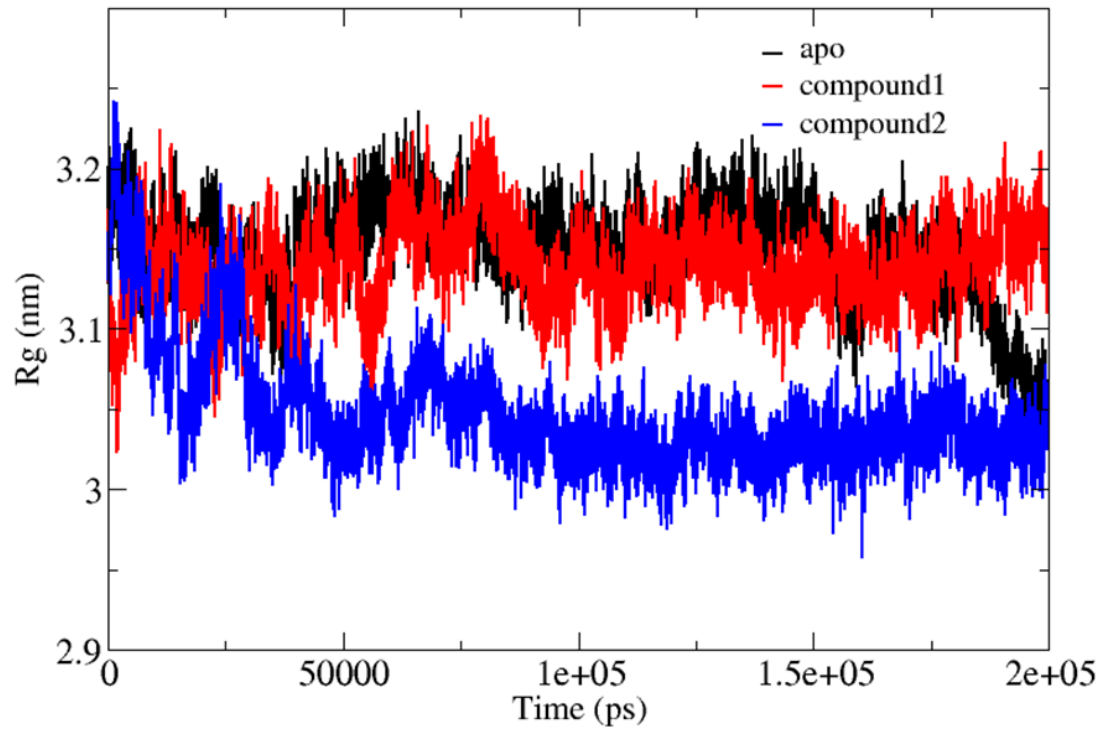

**Table S1:** Five top docking conformation with their binding energy

| <b>Conformations</b> | <b>Binding Energy (kcal/mol)</b> |                   | <b>RMS score</b>  |                   |
|----------------------|----------------------------------|-------------------|-------------------|-------------------|
|                      | <b>Compound 1</b>                | <b>Compound 2</b> | <b>Compound 1</b> | <b>Compound 2</b> |
| Conformation 1       | -5.83                            | -6.24             | 0.0               | 0.0               |
| Conformation 2       | -5.74                            | -4.43             | 0.17              | 0.0               |
| Conformation 3       | -5.61                            | -4.26             | 0.24              | 0.0               |
| Conformation 4       | -5.55                            | -4.05             | 0.97              | 1.26              |
| Conformation 5       | -5.41                            | -4.03             | 1.02              | 0.32              |
